# Supplementary material for: Ectopic MYBL2-Mediated Regulation of Androglobin Gene Expression
Source: Cells. 2024 May 11;13(10):826. doi: 10.3390/cells13100826 (PMC11119863; doi:10.3390/cells13100826)
Supplement: Supplementary file 1 [file cells-13-00826-s001.zip]

Archive with 7 entries (7 files):
- Supplemental Figures and legends_revised3.pdf
- Supplementary Table S1 screening results .xlsx
- Supplementary Table S2 Primer list cloning .xlsx
- Supplementary Table S3 Primer list RT- and ChIP qPCR.xlsx
- Supplementary Table S4  mutations and gRNAs.xlsx
- Supplementary Table S5 ChIP Seq Dataset.xlsx
- Supplementary Table S6 Antibodies.xlsx
