# Supplementary material for: Ectopic MYBL2-Mediated Regulation of Androglobin Gene Expression
Source: Cells. 2024 May 11;13(10):826. doi: 10.3390/cells13100826 (PMC11119863; doi:10.3390/cells13100826)
Supplement: Supplementary file 1 [file cells-13-00826-s001.zip › Supplementary Table S1 screening results .xlsx]

## Sheet: Sheet1
Transcription Factor	RLU
SOX2	up
MYBL2	up
PITX2	up
SOX10	up
KAT14	up
GSH-2	up
CTCF	up
HIST1H2AI	up
LIMS1	up
FLJ25476	up
LASP1	up
ENC2	up
ZNF496	up
FLI1	up
NCALD	up
CITED2	up
ZKSCAN1	up
ZNF395	up
FOXD4L2	up
HMGB2	up
ZNF530	up
GTF2H3	up
NFE2	up
ZFP161	up
OTX1	up
CREB3L1	up
RFP2	up
ZNF630	up
BHLHB2	up
PIAS3	up
TCF12	up
SNAI1	up
ZNF549	up
THRAP6	up
ATF1	up
C19orf6	up
ZFP36L2	up
ZNF670	up
ZNF394	up
ERGIC2	up
NRBP	up
IFI16	up
RORB	up
ZNF143	up
ZNF230	up
TWIST1	up
DAZAP1	up
OPTN	up
TP53	up
ZNF573	up
RNPS1	up
SKP1A	up
PHF21A	up
ZNF597	up
METTL3	up
TLX3	up
ZNF319	up
CCT4	up
LIN28	up
ZNF510	up
GTF2H1	up
OVOL1	up
MYF6	up
EYA4	up
RNF41	up
FLJ11011	up
HIST1H2BO	up
NFKBIL1	-
FOS	-
TRIM45	-
TFDP2	-
RFP	-
ZNF528	-
TCEAL2	-
GTF2B	-
VPS24	-
ZNF334	-
LEF1	-
GATAD2B	-
CREG1	-
ARC	-
LMO3	-
ESRRG	-
GABPB2	-
MYNN	-
CRK	-
SSRP1	-
ZNF556	-
CRX	-
SMYD3	-
HOXB13	-
TCF19	-
ISL2	-
POU4F3	-
HIST1H2BL	-
RFPL1	-
ZNF433	-
ZNF226	-
NGLY1	-
ETV4	-
CD3EAP	-
ZNF502	-
C20orf100	-
PSMC3	-
ZNF623	-
NSBP1	-
NFE2L2	-
MXD3	-
HKR3	-
THRAP4	-
SMAD2	-
CIP29	-
ZNF562	-
PYGO2	-
ORC3L	-
PPP2R5B	-
ELF1	-
TEAD2	-
FOSL1	-
ZNF354A	-
LOC146542	-
C21orf66	-
HIST1H2BI	-
H2AFZ	-
CCNDBP1	-
NANOG	-
NFKBIL2	-
HSFY1	-
ETV3	-
MECP2	-
SPIC	-
LZTS1	-
ZNF179	-
ANP32A	-
SIX4	-
ETS2	-
PJA1	-
CRTC1	-
NR4A1	-
ZNF571	-
GDF8	-
MYCBP	-
ITM2A	-
DPF3	-
ZNF791	-
MYB	-
YEATS4	-
TCEA3	-
CSRP2	-
MKRN3	-
SRY	-
Gli2	-
GLIS1	-
TCEB1	-
NR1H3	-
ETV6	-
KCNIP3	-
MSL3L1	-
LOC115648	-
XBP1	-
CTNNB1	-
C1orf181	-
TAF7	-
BANP	-
DYRK1B	-
PKNOX1	-
HIST2H2AC	-
PRDM4	-
ID1	-
EED	-
TRIM52	-
TRIM68	-
LHX1	-
H1F0	-
ZBTB1	-
UHRF2	-
C1D	-
SPANXA2	-
ELF3	-
ETR101	-
G22P1	-
DMRTC2	-
SNAPC3	-
CBX6	-
CBFB	-
ELF5	-
CEBPG	-
NFX1	-
ZNF70	-
KLF8	-
TRIM44	-
TFCP2L1	-
MDS032	-
YY1	-
RNF10	-
SATB1	-
C14orf92	-
MED8	-
NEUROD6	-
HIST1H2AM	-
PLAC9	-
HIST1H2AG	-
NEUROG1	-
LASS4	-
GTF3C5	-
POLR2I	-
SURB7	-
OTEX	-
SMYD5	-
TAF1A	-
COPS2	-
HLX1	-
ZNF345	-
WBP5	-
ENC1	-
TCEB3	-
MSX2	-
MBNL3	-
MTERF	-
OIP106	-
NRIP1	-
SEI1	-
MGC4618	-
NFKBIA	-
RFPL2	-
ZNF182	-
ZNF668	-
ZNF317	-
BID	-
LIM	-
ZXDA	-
SSX5	-
KLHDC5	-
NKX3-1	-
NFYB	-
KLHL6	-
ASCL1	-
UBXD2	-
ZNFN1A2	-
ZNF165	-
ZNF548	-
MEF2C	-
PRIM2A	-
CDK9	-
HIST1H2BN	-
OR2H2	-
NKX2-2	-
PSMC2	-
CBX5	-
GDF2	-
STAT3	-
RNF13	-
HDAC1	-
TCF2	-
NFYA	-
ZNF566	-
POLR2K	-
RNF8	-
ARNT2	-
TBC1D10B	-
LHX6	-
ZSCAN4	-
KIAA0961	-
EYA3	-
NBL1	-
NRF1	-
ZNF449	-
BACH1	-
PXMP3	-
ZNF684	-
GATAD2A	-
HIST1H4F	-
ISGF3G	-
PKNOX2	-
REQ	-
DMAP1	-
EBF	-
SSX2	-
C14orf116	-
TITF1	-
FUBP1	-
HOXD3	-
ZNF239	-
ZNF626	-
KBTBD7	-
RBM4	-
ORC4L	-
CBX1	-
SBZF3	-
ZFAND3	-
ZNF193	-
HIS1H1B	-
ZNF415	-
TFDP3	-
SOX4	-
ABT1	-
CREB1	-
THRA	-
ZA20D2	-
ORC5L	-
TCEAL7	-
FHL5	-
SOX15	-
MGC23908	-
RGS2	-
HIST1H3G	-
SSX4	-
MADH1	-
KEAP1	-
GATA3	-
ZNF461	-
H3F3B	-
KLHL12	-
CFDP1	-
SET	-
IRX3	-
CRIP1	-
ZNF555	-
AIP	-
TCEA2	-
FHL1	-
HOXA10	-
ORC2L	-
NR1D2	-
LHX4	-
TARDBP	-
GIPC1	-
HHEX	-
CRSP8	-
L3MBTL2	-
CRIP2	-
CDK5	-
LDB1	-
NCBP2	-
SYVN1	-
ZNF155	-
ISL1	-
RNF40	-
ZNF364	-
TRIM40	-
TRIM35	-
GTF2A2	-
SMARCE1	-
NR2E1	-
CCNH	-
ZYX	-
HIST1H2BB	-
UBP1	-
Gli3	-
PEPP-2	-
MGC16733	-
SUFU	-
BTF3	-
ARID3A	-
CHRAC1	-
SAP18	-
PLAUR	-
RP9	-
RNF144	-
ERF	-
ERG	-
ZNF643	-
SKIL	-
DIDO1	down
GTF2H5	down
EAF2	down
EDF1	down
ZNF224	down
HIST1H1A	down
PRPF4	down
NCOA4	down
TFAP4	down
ZNF408	down
HSF2BP	down
SNAI2	down
HIST1H1T	down
MEIS2	down
NFATC3	down
RIPX	down
TXN2	down
RBBP5	down
TRIM22	down
NPLOC4	down
ZA20D3	down
GTF2F1	down
FLJ35954	down
TFEB	down
IRF1	down
ABCF2	down
BLZF1	down
ZNF354B	down
ZNF223	down
BTG1	down
GTF2IRD1	down
PIAS4	down
ZNF266	down
IFI35	down
EZH2	down
PTTG1IP	down
HOXB7	down
JAZF1	down
FLJ32112	down
PDLIM1	down
PWP1	down
ZNF513	down
HOXA3	down
ZNF397	down
ZNF180	down
CITED1	down
ZNF677	down
TRIP6	down
STAF42	down
TAF6	down
RBPSUH	down
SNAPC1	down
NPAS4	down
AATF	down
BZW2	down
ZDHHC5	down
C19orf28	down
PAX4	down
RAD18	down
TRIP13	down
TRIP10	down
MBNL2	down
ZNF436	down
C14orf166	down
TEAD4	down
ZNF482	down
NCBP1	down
HEXIM1	down
JUNB	down
ZNF581	down
ELL2	down
TCEAL1	down
RBL1	down
RFX5	down
MANSC1	down
ELF3	down
PPARG	down
CREB3	down
ZNF426	down
HIST1H4C	down
LOC51058	down
MADH4	down
GATA2	down
LHX2	down
RAD18	down
THRSP	down
RB1	down
Gli1	down
SCML1	down
ILF2	down
TFAP2A	down
GFI1	down
CBFA2T3	down
LPXN	down
RING1	down
UHRF1	down
NFIC	down
BATF	down
TGIF	down
NFE2L1	down
HGS	down
POU2F3	down
MKRN2	down
NFIB	down
C9orf152	down
ALF	down
TCEB3C	down
WWTR1	down
CTDSP1	down
ZNF559	down
TRIM49	down
ZNF395	down
ZNF10	down
