# Supplementary material for: Ectopic MYBL2-Mediated Regulation of Androglobin Gene Expression
Source: Cells. 2024 May 11;13(10):826. doi: 10.3390/cells13100826 (PMC11119863; doi:10.3390/cells13100826)
Supplement: Supplementary file 1 [file cells-13-00826-s001.zip › Supplementary Table S2 Primer list cloning .xlsx]

## Sheet: Sheet1
Target	Term	Primer	Sequence (5' to 3 ')	Source
pFLAG-PITX2		forward	GTTAAAAGCTTATGAACTGCATGAAAGGCCC HindII site underlined
		reverse	CTAAGGTACCTCACACGGGCCGGTCCACTGCATACT KpnI site underlined
pGL3b_AP130 - 90	AP431_Ca	forward	TTGGGTACCTCTGCAGCCACAGGCCGCAGAGCCCGCCCCCAGGGCCCCGGCTAGCCATTC KpnI site underlined
(-130 to -90 bp)		reverse	GAATGGCTAGCCGGGGCCCTGGGGGCGGGCTCTGCGGCCTGTGGCTGCAGAGGTACCCAA NheI site underlined
pGL3b_AP100	AP431_Cb	forward	TATATGGTACCCAGGGCCCCGCCCCCGCTCTCCGGGCGCTGGGCTAGCCGGCT KpnI site underlined
(-100 to -60 bp)		reverse	AGCCGGCTAGCCCAGCGCCCGGAGAGCGGGGGCGGGGCCCTGGGTACCATATA NheI site underlined
pGL3B-AP2014-1065	AP1981	forward	TAATAGGCAAGGTACCCTCGTCACATCTTTTATGAT, KpnI site underlined	Koay et al. 2021
(-2014 to -1065 bp)		reverse	CCTCACTTCGCTAGCATCTGACACACAGCCCTTAG, NheI site underlined	Koay et al. 2021
pGL3B-AP1064-465	AP1032	forward	GGCTGTGTGGGTACCATCTCTGAAGTGAGGTTATATTG, KpnI site underlined	Koay et al. 2021
(-1064 to -465 bp)		reverse	TGAAAACCTGCTAGCCAGAAATTAACACAGTGGGTG, NheI site underlined	Koay et al. 2021
pGL3B-AP464-1	AP431	forward	AATTTATTAAGGTACCGACCCCAGGTTTTCAAGCCA, KpnI site underlined	Koay et al. 2021
(-464 to -1 bp)		reverse	ATCTATATATGCTAGCGCTCTGAGCAAAGAGCCTGC, NheI site underlined	Koay et al. 2021
pGL3B-AP464-271	AP431_A	forward	AATTTATTAAGGTACCGACCCCAGGTTTTCAAGCCA, KpnI site underlined	Koay et al. 2021
(-464 to -271 bp)		reverse	TTATAGTTATGCTAGCCCTACACTGCCTGGCTTTGC, NheI site underlined	Koay et al. 2021
pGL3B-AP270-141	AP431_B	forward	ATACATACAGGGTACCTCCTGCAGAACTCCAATTAATC, KpnI site underlined	Koay et al. 2021
(-270 to -141 bp)		reverse	TGTAGATAGAGCTAGCAGCATAAACTGAAATCCCAC, NheI site underlined	Koay et al. 2021
pGL3B-AP140-1	AP431_C	forward	TATTTAAATTGGTACCCTTGCGTCCCTCTGCAGCCA, KpnI site underlined	Koay et al. 2021
(-140 to -1 bp)		reverse	ATCTATATATGCTAGCGCTCTGAGCAAAGAGCCTGC, NheI site underlined	Koay et al. 2021
pGL3B-AP130-11	AP431_C10	forward	CCTTGGGTACCTCTGCAGCCACAGGCCGCAGAG, KpnI site underlined	Koay et al. 2021
(-130 to -11bp)		reverse	CATTCGCTAGCAAGAGCCTGCGGGCGCGCTC, NheI site underlined	Koay et al. 2021
pGL3B-AP120-21	AP431_C20	forward	CTATAGGTACCCAGGCCGCAGAGCCCGCCCCCAG, KpnI site underlined	Koay et al. 2021
(-120 to -21 bp)		reverse	AAAGAGCTAGCGGGCGCGCTCGGCTCCGCGTC, NheI site underlined	Koay et al. 2021
pGL3B-AP110-31	AP431_C30	forward	ATATTGGTACCAGCCCGCCCCCAGGGCCCCG, KpnI site underlined	Koay et al. 2021
(-110 to -31 bp)		reverse	TGAGTGCTAGCGGCTCCGCGTCTGCGTTGC, NheI site underlined	Koay et al. 2021
pGL3B-AP100-41	AP431_C40	forward	TATATGGTACCCAGGGCCCCGCCCCCGCTCT, KpnI site underlined	Koay et al. 2021
(-100 to -41 bp)		reverse	CGGCTGCTAGCCTGCGTTGCCAGGAGACGGCGT, NheI site underlined	Koay et al. 2021
pGL3B-AP140-71	AP431_C1	forward	TATTTAAATTGGTACCCTTGCGTCCCTCTGCAGCCA, KpnI site underlined	Koay et al. 2021
(-140 to -71 bp)		reverse	ATTAAGCTAGCCAGCGCCCGGAGAGCG, NheI site underlined	Koay et al. 2021
pGL3B-AP70-1	AP431_C2	forward	TATATGGTACCGACGCGGGACGCCGTCTCC, KpnI site underlined	Koay et al. 2021
(-70 to -1 bp)		reverse	ATCTATATATGCTAGCGCTCTGAGCAAAGAGCCTGC, NheI site underlined	Koay et al. 2021
