# Supplementary material for: Ectopic MYBL2-Mediated Regulation of Androglobin Gene Expression
Source: Cells. 2024 May 11;13(10):826. doi: 10.3390/cells13100826 (PMC11119863; doi:10.3390/cells13100826)
Supplement: Supplementary file 1 [file cells-13-00826-s001.zip › Supplementary Table S3 Primer list RT- and ChIP qPCR.xlsx]

## Sheet: Sheet1
Target	Organism	Primer	Sequence (5' to 3 ')	Assays
ADGB	H. sapiens	forward	ACT TCA GGG GAA CCT CCT CTT	RT-qPCR
		reverse	AAG CAT TGG CCA CAG TTC AAA
Actin	H. sapiens	forward	CTG GAA CGG TGA AGG TGA CA	RT-qPCR
		reverse	AAG GGA CTT CCT GTA AGA ATG
MYBL2	H. sapiens	forward	GAG GGA TAG CAA GTG CAA GGT	RT-qPCR
		reverse	TTC CAG TCC TGC TGT CCA AA
FOXJ1	H. sapiens	forward	TCGTATGCCACGCTCATCTG	RT-qPCR
		reverse	CGGATTGAATTCTGCCAGGT
PIXT2	H. sapiens	forward	AGG CCA CTT TCC AGA GGA AC	RT-qPCR
		reverse	CGC TCC CTC TTT CTC CAT TT
SOX2	H. sapiens	forward	AACCAGCGCATGGACAGTTA	RT-qPCR
		reverse	GACTTGACCACCGAACCCAT
SOX10	H. sapiens	forward	AGG CTG CTG AAC GAA AGT GAC AAG	RT-qPCR
		reverse	ACT TGT AGT CCG GGT GGT CTT TCT
KAT14	H. sapiens	forward	CTA GGA GCT CGA AGG TGG TG	RT-qPCR
		reverse	GTC ACG AAG CCT CTG CTG G
GSH-2	H. sapiens	forward	CAG TTC TCT TCG GCT CCT GG	RT-qPCR
		reverse	GCG TCA GAG CCT CCC
CTCF	H. sapiens	forward	CCC AAA CAG AAC CAG CCA AC	RT-qPCR
		reverse	TCC TCT TCC TCT CCC TCT GC
ADGB 5'	H. sapiens	forward	AGG TGA CAA TTT CAG GCA TCG	ChIP-qPCR
		reverse	GGA CCT GAG AGA CTG ATG AAC G
ADGB 3'	H. sapiens	forward	TCA TTG GTG ACA ACG GGC TA	ChIP-qPCR
		reverse	ATG CAG ACT TTG GGC ACA GG
ADGB -184/+21	H. sapiens	forward	AACTCCAAGTTCCTCCACGG	ChIP-qPCR
		reverse	AGCCGATCTATGTAGGGCTGA
AURKA promoter	H. sapiens	forward	GCT GCC TTG TGA TTG GTT GA	ChIP-qPCR
		reverse	TCC GGG TTC TTA GGG AGC AA
AURKA promoter (neg control)	H. sapiens	forward	GGC TGC CTT GTG ATT GGT TG	ChIP-qPCR
		reverse	CTT CCG GGT TCT TAG GGA GC
