# Supplementary material for: Ectopic MYBL2-Mediated Regulation of Androglobin Gene Expression
Source: Cells. 2024 May 11;13(10):826. doi: 10.3390/cells13100826 (PMC11119863; doi:10.3390/cells13100826)
Supplement: Supplementary file 1 [file cells-13-00826-s001.zip › Supplementary Table S4 mutations and gRNAs.xlsx]

## Sheet: Sheet1
Construct	Term	Sequence (5' to 3 ')	Source	mutation site
pGL3B-AP140-1_Mut1	AP431_Cmut1	CAGGAAAAAGCCCCCGCTCTCCGGGCGCTGGACGCGGGACGCCGTCTCCTGGCAACGCAG, mutation site underlined	Koay et al. 2021	(mutation at - 96 to -92 bp)
pGL3B-AP140-1_Mut2	AP431_Cmut2	CAGGGCCCCGCCCCCGCTCTCCGGGCGAAATTTGCGGGACGCCGTCTCCTGGCAACGCAG, mutation site underlined	Koay et al. 2021	(mutation at -73 to -68 bp)
pGL3B-AP140-1_Mut3	AP431_Cmut3	CAGGGCCCCGCCCCCGCTCTCCGGGCGCTGGACGCGGGACGCCAAAAAATGGCAACGCAG, mutation site underlined	Koay et al. 2021	(mutation at -57 to -52 bp)
pGL3B-AP140-1_Mut4	AP431_Cmut4	CAGGGCCCCGCCCCCGCTCTCCGGGCGCTGGACGCGGGACGCCGTCTCCAAATTTCGCAG, mutation site underlined	Koay et al. 2021	(mutation at -51 to -46 bp)
Term	strand	Sequence (5' to 3 ')		binding site
gRNA_α	antisense	CCGGCGTCTCGGGGCGGGGGT	Koay et al. 2021	binding at -120 to -100 bp
gRNA_β	antisense	GCGAGAGGCCCGCGACCTGCG	Koay et al. 2021	binding at -86 to -66 bp
gRNA_γ	antisense	CAGAGGACCGTTGCGTCTGC	Koay et al. 2021	binding at -57 to -37 bp
