# Supplementary material for: Ectopic MYBL2-Mediated Regulation of Androglobin Gene Expression
Source: Cells. 2024 May 11;13(10):826. doi: 10.3390/cells13100826 (PMC11119863; doi:10.3390/cells13100826)
Supplement: Supplementary file 1 [file cells-13-00826-s001.zip › Supplementary Table S5 ChIP Seq Dataset.xlsx]

## Sheet: Sheet1
Project	data type	reanalysed	organism	cell type	description	result
PRJNA855041	ChIP-Seq	y	human	melanoma cell line	MYBL2 pulldown in A2058 cells	overall weak signal, no enrichment in ADGB promoter
PRJNA830692	ChIP-Seq	n	human	lung cancer cells	MYBL2 pulldown in A549 cells	MYBL2 targets positive; no binding to ADGB promoter
PRJNA751732	ChIP-Seq	y	human	MV411 leukemia	MYBL2 pulldown in MV411cells	MYBL2 targets positive; no binding to ADGB promoter
PRJNA490874	ChIP-Seq	y	human	Ewing sarcoma	MYBL2 pulldown in A673 cells	MYBL2 targets positive; no binding to ADGB promoter
PRJNA420798	RNA-Seq	y	mouse	embryonic fibroblasts	Overexpression of Mybl2 in murine embryonic fibroblasts	no induction of Adgb expression
PRJNA420796	ATAC-Seq	n	mouse	embryonic fibroblasts	Overexpression of Mybl2 in murine embryonic fibroblasts	overexpression does not alter accessibility of Adgb locus
PRJNA159171	ChIP-Seq	y	mouse		removed after quality check
Encode-Datasets
ENCSR000BRO	ChIP-Seq	n	human	HepG2	MYBL2 pulldown in HepG2 cells	MYBL2 targets positive; weak enrichment in ADGB Promoter, not statistically significant
ENCSR581KCO	ChIP-Seq	n	human	HepG2	MYBL2 pulldown in modified HepG2 cells	MYBL2 targets positive; weak enrichment in ADGB Promoter, not statistically significant
ENCSR162IEM	ChIP-Seq	n	human	K562	MYBL2 pulldown in K562 cells	MYBL2 targets positive; no signal in ADGB Promoter
ENCSR361UTL	ChIP-Seq	n	human	K562	MYBL2 pulldown in modified K562 cells	MYBL2 targets positive; no signal in ADGB Promoter
