# Supplementary material for: Ectopic MYBL2-Mediated Regulation of Androglobin Gene Expression
Source: Cells. 2024 May 11;13(10):826. doi: 10.3390/cells13100826 (PMC11119863; doi:10.3390/cells13100826)
Supplement: Supplementary file 1 [file cells-13-00826-s001.zip › Supplementary Table S6 Antibodies.xlsx]

## Sheet: Sheet1
Target	Host	company	Reference Nr.
ADGB	Rabbit	SIGMA	#HPA036340
B-myb (MYBL2)	Rabbit	Proteintech	18896-1-AP
PITX2	Rabbit	SIGMA	HPA050074
pFLAG	Rabbit	Proteintech	20543-1-AP
V5	Mouse	Invitrogen	46-0705
Mouse secondary	Sheep	Amersham	#NA931
Rabbit secondary	Donkey	Amersham	#NA934
